# Supplementary material for: Dynamics matter: differences and similarities between alternatively designed mechanisms
Source: Royal Society of Chemistry journal article supplement (doi:10.1039/c4mb00159a), 2014-04-30
Supplement: c4mb00159a1.pdf [file c4mb00159a1.pdf]

## Supplementary Materials for the paper entitled "Dynamics matter: Differences and similarities between alternatively designed mechanisms"

### I. The Analytical Solutions of the Models

Consider the following initial value problem (IVP)

$$\frac{dP}{dt} = a - bP, \quad P(t_0) = P_0$$

The solution of this IVP is

$$P(t) = \frac{a}{b} + \left(P_0 - \frac{a}{b}\right) e^{-b(t-t_0)} \quad (\text{S.1})$$

For signal profiles  $S(t)$  in Eq.(4), our original models  $M_1$ - $M_4$  can be approximated by the following two different initial value problems,

$$\frac{dP}{dt} = \begin{cases} a - bP, & P(0) = P_0 \quad \text{if } 0 \leq t < k \\ \alpha - \beta P, & P(k) = A \quad \text{if } t \geq k \end{cases} \quad (\text{S.2})$$

From Eqs. (S.1) and (S.2), the solutions of these IVPs respectively become

$$P(t) = \begin{cases} \frac{a}{b} + \left(P_0 - \frac{a}{b}\right) e^{-bt} & , \quad \text{if } 0 \leq t < k \\ \frac{\alpha}{\beta} + \left(A - \frac{\alpha}{\beta}\right) e^{-\beta(t-k)} & , \quad \text{if } t \geq k \end{cases} \quad (\text{S.3})$$

where the value of  $A$  is chosen so that  $P(t)$  is continuous throughout the time course. Similarly, in the following equations for the mechanisms  $M_1, M_2, M_3, M_4$ , the constants  $A_1, A_2, A_3, A_4$  are taken to be such that  $P_1, P_2, P_3, P_4$  are the continuous functions of time  $t$ .

### II. Increased degradation rate mechanism( $M_1$ )

For the same  $S(t)$  profile, using Eq. (S.2), the model for mechanism  $M_1$  can be written as

$$\frac{dP_1}{dt} = \begin{cases} \alpha - \beta(1 + \gamma)P_1, & P_1(0) = \frac{\alpha}{\beta} \quad \text{if } 0 \leq t < k \\ \alpha - \beta P_1, & P_1(k) = A_1 \quad \text{if } t \geq k \end{cases} \quad (\text{S.4})$$

From Eq. (S.3), the solution of Eq. (S.4) becomes

$$P_1(t) = \begin{cases} \frac{\alpha}{(1+\gamma)\beta} + \frac{\alpha}{\beta} \frac{\gamma}{(1+\gamma)} e^{-\beta(1+\gamma)t} & , \text{ if } 0 \leq t < k \\ \frac{\alpha}{\beta} + \left(A_1 - \frac{\alpha}{\beta}\right) e^{-\beta(t-k)} & , \text{ if } t \geq k \end{cases} \quad (\text{S.5})$$

For  $0 < t < k$ , the time derivative of Eq. (S.5)

$$P_1'(t) = -\alpha\gamma e^{-\beta(1+\gamma)t} < 0$$

Since this derivative is always negative, the solution  $P_1(t)$  is a decreasing function of  $t$  and it takes its minimum value on  $[0, k]$  at the high endpoint  $k$  as

$$P_1(k) = \frac{\alpha}{(1 + \gamma)\beta} + \left(\frac{\alpha}{\beta} - \frac{\alpha}{(1 + \gamma)\beta}\right) e^{-\beta(1+\gamma)k} \quad (\text{S.6})$$

### III. Decreased production rate mechanism( $M_2$ )

By using Eq. (S.2), the model  $M_2$  can be written as

$$\frac{dP_2}{dt} = \begin{cases} \frac{\alpha}{1+\gamma} - \beta P_2, & P_2(0) = \frac{\alpha}{\beta} \quad \text{if } 0 \leq t < k \\ \alpha - \beta P_2, & P_2(k) = A_2 \quad \text{if } t \geq k \end{cases} \quad (\text{S.7})$$

for the same  $S(t)$  function in Eq.(4). By Eq.(S.3), the solution of (S.7) has the following form

$$P_2(t) = \begin{cases} \frac{\alpha}{(1+\gamma)\beta} + \frac{\alpha}{\beta} \frac{\gamma}{(1+\gamma)} e^{-\beta t} & , \text{ if } 0 \leq t < k \\ \frac{\alpha}{\beta} + \left(A_2 - \frac{\alpha}{\beta}\right) e^{-\beta(t-k)} & , \text{ if } t \geq k \end{cases} \quad (\text{S.8})$$

For  $0 < t < k$ , the time derivative of Eq.(S.8) is

$$P_2'(t) = -\frac{\alpha\gamma}{1 + \gamma} e^{-\beta t} < 0$$

which is always negative. Therefore, the solution  $P_2(t)$  is a decreasing function of  $t$  over the interval  $[0, k]$  and it takes its minimum value on  $[0, k]$  at the high endpoint  $k$  as

$$P_2(k) = \frac{\alpha}{(1 + \gamma)\beta} + \left(\frac{\alpha}{\beta} - \frac{\alpha}{(1 + \gamma)\beta}\right) e^{-\beta k} \quad (\text{S.9})$$

#### IV. Decreased degradation rate mechanism( $M_3$ )

Again, using Eq.(S.2), the model for mechanism  $M_3$  becomes

$$\frac{dP_3}{dt} = \begin{cases} \alpha - \frac{\beta P_3}{(1+\gamma)}, & P_3(0) = \frac{\alpha}{\beta} \quad \text{if } 0 \leq t < k \\ \alpha - \beta P_3, & P_3(k) = A_3 \quad \text{if } t \geq k \end{cases} \quad (\text{S.10})$$

for the same signal function as above. From Eq.(S.3), the solution of Eq. (S.10) is

$$P_3(t) = \begin{cases} \frac{\alpha(1+\gamma)}{\beta} - \frac{\alpha\gamma}{\beta} e^{-\frac{\beta t}{(1+\gamma)}} & , \quad \text{if } 0 \leq t < k \\ \frac{\alpha}{\beta} + \left(A_3 - \frac{\alpha}{\beta}\right) e^{-\beta(t-k)} & , \quad \text{if } t \geq k \end{cases} \quad (\text{S.11})$$

For  $0 < t < k$ , the time derivative of Eq. (S.11) becomes

$$P_3'(t) = \frac{\alpha\gamma}{1+\gamma} e^{-\frac{\beta t}{(1+\gamma)}} > 0$$

Since this derivative is always positive, the solution  $P_3(t)$  is an increasing function of  $t$  and takes its highest value on  $[0, k]$  at the higher endpoint  $k$  as

$$P_3(k) = \frac{\alpha(1+\gamma)}{\beta} - \frac{\alpha\gamma}{\beta} e^{-\frac{\beta k}{(1+\gamma)}} \quad (\text{S.12})$$

#### V. Increased production rate mechanism( $M_4$ )

By using Eq. (S.2), the model  $M_4$  will have the following form

$$\frac{dP_4}{dt} = \begin{cases} \alpha(1+\gamma) - \beta P_4, & P_4(0) = \frac{\alpha}{\beta} \quad \text{if } 0 \leq t < k \\ \alpha - \beta P_4, & P_4(k) = A_4 \quad \text{if } t \geq k \end{cases} \quad (\text{S.13})$$

for the same signal profile as above. By Eq.(S.3), the solution of Eq.(S.13) has the following solution

$$P_4(t) = \begin{cases} \frac{\alpha(1+\gamma)}{\beta} - \frac{\alpha\gamma}{\beta} e^{-\beta t} & , \quad \text{if } 0 \leq t < k \\ \frac{\alpha}{\beta} + \left(A_4 - \frac{\alpha}{\beta}\right) e^{-\beta(t-k)} & , \quad \text{if } t \geq k \end{cases} \quad (\text{S.14})$$

For  $0 < t < k$ , the time derivative of Eq. (S.14) becomes

$$P_4'(t) = \alpha\gamma e^{-\beta t} > 0$$

This is always positive, which makes the solution  $P_4(t)$  an increasing function of  $t$  over the interval

$[0, k]$ . This solution attains its highest value on  $[0, k]$  at the higher endpoint  $k$ , which is equal to

$$P_4(k) = \frac{\alpha(1+\gamma)}{\beta} - \frac{\alpha\gamma}{\beta}e^{-\beta k} \quad (\text{S.15})$$

## VI. Comparison of the signal induced activation mechanisms

**Maximum protein abundance ( $mP$ ):** From Eqs.(S.12) and (S.15), we have  $P_3(k) < P_4(k)$  since  $e^{-\beta k} < e^{-\frac{\beta k}{(1+\gamma)}}$  for any positive  $k, \beta$  and  $\gamma$ . In fact, for any  $t \in [0, k]$ ,  $P_3(t) < P_4(t)$  must hold. This observation suggests that  $mP$  levels are lower in mechanism  $M_3$  compared to mechanism  $M_4$ , and this result does not depend on  $\alpha$  and  $\beta$  values.

**Minimal response time ( $mT$ ):** Theoretically, the time required to reach minimal  $P_3(t)$  and  $P_4(t)$  values are equal to  $k$  for both models. However, since  $e^{-\beta t} < e^{-\frac{\beta}{1+\gamma}t}$  for any positive  $t, \beta$  and  $\gamma$ ,  $P_4(t)$  increases faster than  $P_3(t)$ . Since  $mT$  is defined as time required to reach 90% of its maximum value, which makes it longer for  $P_3(t)$ . This observation suggests that  $mT$  is shorter for mechanism  $M_4$  in comparison to mechanism  $M_3$ , and this result is independent from the values of the parameters  $\alpha$  and  $\beta$ .

**Duration ( $D$ ):** Since the signal becomes zero when at  $t = k$  minutes, the same differential equation with different initial conditions describes the dynamics of both  $P_3(t)$  and  $P_4(t)$  dynamics for  $t \geq k$ . Since  $A_3 = P_3(k)$  and  $A_4 = P_4(k)$ ,  $A_3 < A_4$  must hold. This leads to  $P_3(t) < P_4(t)$  for all  $t > k$ . We also know that for any  $t \in [0, k]$ ,  $P_3(t) < P_4(t)$  is true, which makes  $D$  shorter for mechanism  $M_3$ . Our numerical simulations agree with this result, and show a slight variation between the two mechanisms.

**Integrated Response ( $IR$ ):** Since  $mP$  is larger and  $D$  is longer for mechanism  $M_4$ , the integrated response  $IR$  becomes larger for this mechanism. Our numerical simulations support this result.
